# Supplementary material for: A new route for the synthesis of methacrylic acid from 2-methyl-1,3-propanediol by integrating biotransformation and catalytic dehydration
Source: Royal Society of Chemistry journal article supplement (doi:10.1039/c2gc35214a), 2012-01-01
Supplement: c2gc35214a.pdf [file c2gc35214a.pdf]

1  
2  
3  
4  
5  
6  
7  
8  
9  
10  
11  
12  
13  
14  
15  
16  
17  
18  
19  
20  
21  
22  
23  
24  
25  
26  
27  
28  
29  
30  
31  
32  
33

## Electronic Supplementary Information

# A new route for the synthesis of methacrylic acid from 2-methyl-1,3-propanediol by integrating biotransformation and catalytic dehydration

Sang-Hyun Pyo<sup>a,\*</sup>, Tarek Dishisha<sup>a</sup>, Secil Dayankac<sup>a</sup>, Jargalan Gerelsaikhan<sup>a</sup>,  
Stefan Lundmark<sup>b</sup>, Nicola Rehnberg<sup>c</sup>, and Rajni Hatti-Kaul<sup>a</sup>

<sup>a</sup> Department of Biotechnology, Center for Chemistry and Chemical Engineering, Lund University, Box 124, SE-221 00 Lund, Sweden

<sup>b</sup> Perstorp AB, 284 80 Perstorp, Sweden

<sup>c</sup> Strategic R&D, Bona AB, Box 210 74, 200 21 Malmö, Sweden

\*Corresponding Author

Tel: +46-46-222-4838; Fax: +46-46-222-4713

E-mail: Sang-Hyun.Pyo@biotek.lu.se (S.-H. Pyo)

34 Fig. S1. Gas chromatograms of (A) 2-methyl-1,3-propanediol (1), (B) reaction mixture  
35 containing 3-hydroxy-2-methylpropanal (2), 2-methyl-1,3-propanediol and 3-hydroxy-2-  
36 methylpropionic acid (3), (C) 3-hydroxy-2-methylpropionic acid, and (D) methacrylic  
37 acid (4). Experimental details are provided in the text.

38

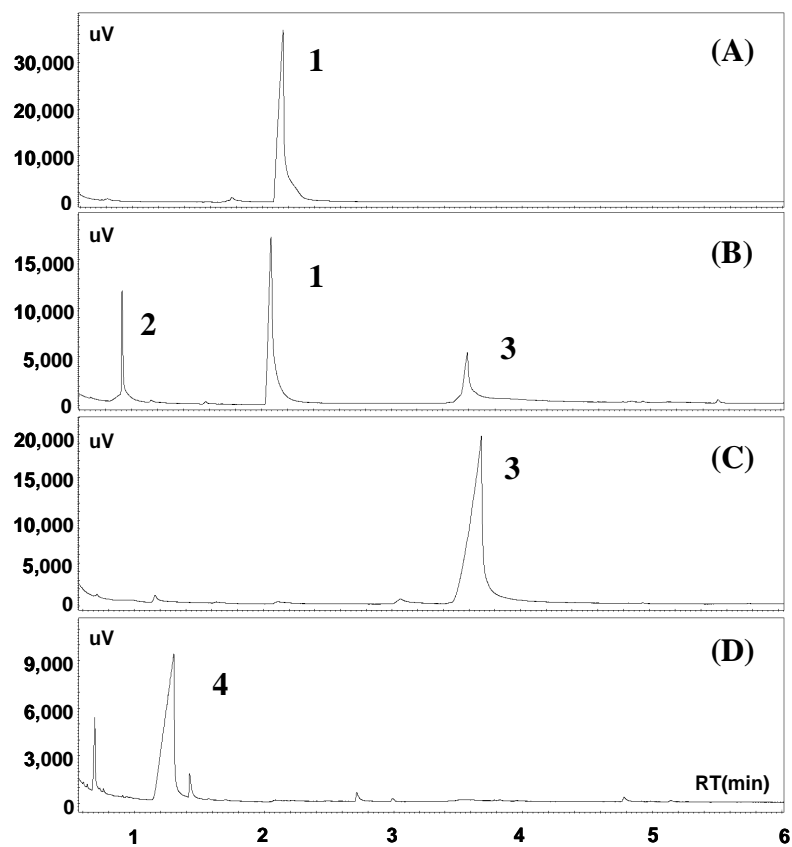

42 Fig. S2. GC-MS and NMR data of reaction components. Mass spectrum of 2-methyl-1,3-  
43 propandiol (A, cal. MW 90.12), 3-hydroxy-2-methylpropenal (B, cal. MW 88.10), 3-  
44 hydroxy-2-methylpropionic acid (C, cal. MW 104.10), and methacrylic acid (D, cal. MW  
45 86.09). <sup>13</sup>C-NMR spectrum; (E) derivatized 3-hydroxy-2-methylpropanal (CDCl<sub>3</sub>), (F) 3-  
46 hydroxy-2-methylpropionic acid and its <sup>1</sup>H-NMR (DMSO-d<sub>6</sub>): 0.98 (d, 3H), 2.38(m, 1H),  
47 3.39(m, 1H), 3.50(m, 1H).

48

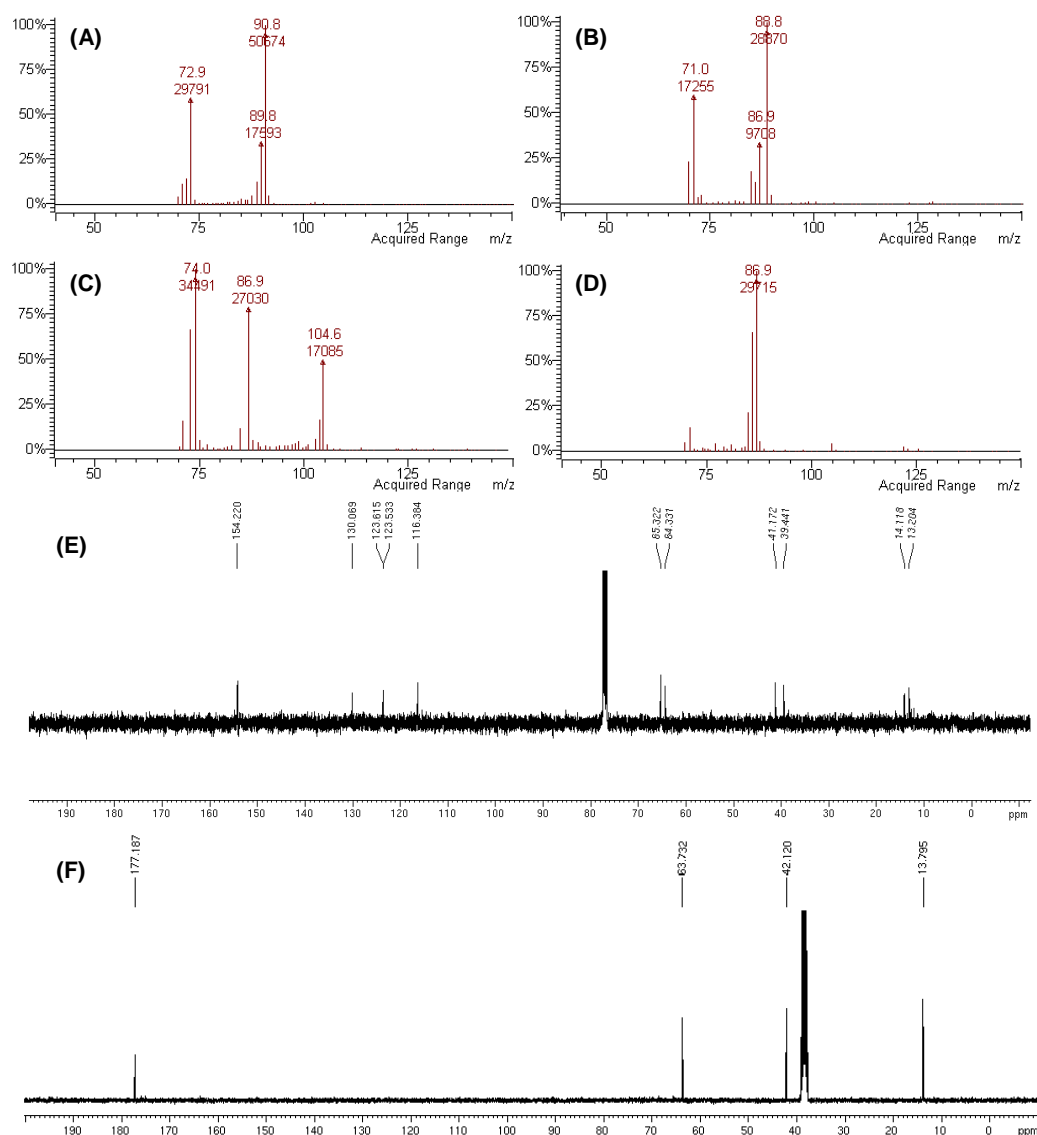

49

50
